# Supplementary material
Source: publisher figshare collection journal article supplement (https://plos.figshare.com/articles/dataset/_/3402484)
Supplement: Supplementary file [file 1]

# DEXSeq differential exon usage test

## Experimental design

| sample                | condition |
|-----------------------|-----------|
| control_YW4.count     | control   |
| treatment1_AA3.count  | treatment |
| treatment2_AMA3.count | treatment |
| treatment3_ZL1.count  | treatment |

**formulaDispersion** = ~sample + exon + condition:exon

**formula0** = ~sample + exon

**formula1** = ~sample + exon + condition:exon

## testForDEU result table

| geneID                      | chr                             | start | end   | total_exons | exon_changes |
|-----------------------------|---------------------------------|-------|-------|-------------|--------------|
| <a href="#">XLOC_000521</a> | gi 351001753 emb CADV01010257.1 | 3433  | 16810 | 38          | 1            |
| <a href="#">XLOC_000520</a> |                                 |       |       |             |              |
| <a href="#">XLOC_000517</a> |                                 |       |       |             |              |
| <a href="#">XLOC_000518</a> |                                 |       |       |             |              |
| <a href="#">XLOC_000623</a> | gi 351001765 emb CADV01010245.1 | 62156 | 64889 | 3           | 2            |
| <a href="#">XLOC_000709</a> | gi 351001785 emb CADV01010225.1 | 11357 | 18027 | 20          | 1            |
| <a href="#">XLOC_000714</a> |                                 |       |       |             |              |
| <a href="#">XLOC_001994</a> | gi 351002454 emb CADV01009556.1 | 493   | 2762  | 5           | 1            |
| <a href="#">XLOC_002687</a> | gi 351002689 emb CADV01009321.1 | 1769  | 5549  | 10          | 6            |
| <a href="#">XLOC_002692</a> |                                 |       |       |             |              |
| <a href="#">XLOC_002961</a> | gi 351002822 emb CADV01009188.1 | 9616  | 11917 | 6           | 1            |
| <a href="#">XLOC_002967</a> |                                 |       |       |             |              |
| <a href="#">XLOC_003208</a> | gi 351002943 emb CADV01009067.1 | 15730 | 21492 | 14          | 6            |
| <a href="#">XLOC_003204</a> |                                 |       |       |             |              |
| <a href="#">XLOC_003401</a> | gi 351003026 emb CADV01008984.1 | 26146 | 28035 | 7           | 1            |
| <a href="#">XLOC_003991</a> | gi 351003270 emb CADV01008740.1 | 7241  | 8219  | 7           | 1            |
| <a href="#">XLOC_003990</a> |                                 |       |       |             |              |
| <a href="#">XLOC_004276</a> | gi 351003344 emb CADV01008666.1 | 2765  | 12517 | 33          | 1            |
| <a href="#">XLOC_004280</a> |                                 |       |       |             |              |
| <a href="#">XLOC_004281</a> |                                 |       |       |             |              |
| <a href="#">XLOC_005135</a> | gi 351003546 emb CADV01008464.1 | 3288  | 7913  | 17          | 1            |
| <a href="#">XLOC_005139</a> |                                 |       |       |             |              |
| <a href="#">XLOC_005292</a> | gi 351003570 emb CADV01008440.1 | 4491  | 9608  | 16          | 6            |
| <a href="#">XLOC_005286</a> |                                 |       |       |             |              |

|                                                                                                                          |                                 |       |       |    |    |
|--------------------------------------------------------------------------------------------------------------------------|---------------------------------|-------|-------|----|----|
| <a href="#">XLOC_005377</a><br><a href="#">XLOC_005372</a>                                                               | gi 351003586 emb CADV01008424.1 | 2930  | 6996  | 7  | 1  |
| <a href="#">XLOC_005426</a>                                                                                              | gi 351003594 emb CADV01008416.1 | 372   | 11328 | 27 | 1  |
| <a href="#">XLOC_006174</a><br><a href="#">XLOC_006175</a><br><a href="#">XLOC_006176</a>                                | gi 351003867 emb CADV01008143.1 | 2556  | 5808  | 10 | 2  |
| <a href="#">XLOC_006337</a><br><a href="#">XLOC_006333</a>                                                               | gi 351003935 emb CADV01008075.1 | 6166  | 13648 | 12 | 1  |
| <a href="#">XLOC_007374</a><br><a href="#">XLOC_007372</a>                                                               | gi 351004472 emb CADV01007538.1 | 3210  | 6081  | 8  | 1  |
| <a href="#">XLOC_007637</a>                                                                                              | gi 351004647 emb CADV01007363.1 | 13150 | 13486 | 2  | 2  |
| <a href="#">XLOC_008150</a>                                                                                              | gi 351004855 emb CADV01007155.1 | 10368 | 19895 | 14 | 3  |
| <a href="#">XLOC_008855</a><br><a href="#">XLOC_008856</a>                                                               | gi 351005050 emb CADV01006960.1 | 21122 | 27490 | 13 | 1  |
| <a href="#">XLOC_009054</a><br><a href="#">XLOC_009053</a>                                                               | gi 351005162 emb CADV01006848.1 | 12512 | 15950 | 13 | 1  |
| <a href="#">XLOC_009286</a><br><a href="#">XLOC_009288</a>                                                               | gi 351005313 emb CADV01006697.1 | 4384  | 10661 | 18 | 3  |
| <a href="#">XLOC_009669</a><br><a href="#">XLOC_009672</a>                                                               | gi 351005524 emb CADV01006486.1 | 3569  | 16447 | 30 | 1  |
| <a href="#">XLOC_009795</a><br><a href="#">XLOC_009793</a>                                                               | gi 351005553 emb CADV01006457.1 | 18511 | 26945 | 12 | 1  |
| <a href="#">XLOC_011681</a>                                                                                              | gi 351006228 emb CADV01005782.1 | 19917 | 23205 | 12 | 1  |
| <a href="#">XLOC_011905</a>                                                                                              | gi 351006313 emb CADV01005697.1 | 14693 | 15971 | 3  | 1  |
| <a href="#">XLOC_011939</a>                                                                                              | gi 351006324 emb CADV01005686.1 | 12192 | 19626 | 17 | 1  |
| <a href="#">XLOC_012596</a><br><a href="#">XLOC_012595</a>                                                               | gi 351006577 emb CADV01005433.1 | 322   | 18836 | 22 | 2  |
| <a href="#">XLOC_012669</a>                                                                                              | gi 351006595 emb CADV01005415.1 | 71411 | 81930 | 22 | 2  |
| <a href="#">XLOC_012887</a><br><a href="#">XLOC_012890</a>                                                               | gi 351006656 emb CADV01005354.1 | 27174 | 31363 | 7  | 1  |
| <a href="#">XLOC_012927</a><br><a href="#">XLOC_012915</a><br><a href="#">XLOC_012914</a><br><a href="#">XLOC_012928</a> | gi 351006661 emb CADV01005349.1 | 77582 | 84005 | 29 | 1  |
| <a href="#">XLOC_014450</a><br><a href="#">XLOC_014448</a>                                                               | gi 351007240 emb CADV01004770.1 | 11279 | 19727 | 20 | 5  |
| <a href="#">XLOC_014530</a><br><a href="#">XLOC_014523</a>                                                               | gi 351007258 emb CADV01004752.1 | 13    | 12045 | 32 | 13 |
| <a href="#">XLOC_014533</a><br><a href="#">XLOC_014524</a>                                                               | gi 351007258 emb CADV01004752.1 | 15234 | 25800 | 29 | 3  |
| <a href="#">XLOC_014644</a><br><a href="#">XLOC_014656</a>                                                               | gi 351007275 emb CADV01004735.1 | 66124 | 72607 | 19 | 1  |
| <a href="#">XLOC_015087</a><br><a href="#">XLOC_015089</a><br><a href="#">XLOC_015090</a>                                | gi 351007416 emb CADV01004594.1 | 4408  | 8319  | 14 | 3  |

|                                                            |                                 |       |       |    |   |
|------------------------------------------------------------|---------------------------------|-------|-------|----|---|
| <a href="#">XLOC_015257</a><br><a href="#">XLOC_015250</a> | gi 351007479 emb CADV01004531.1 | 10166 | 12435 | 7  | 2 |
| <a href="#">XLOC_015319</a><br><a href="#">XLOC_015313</a> | gi 351007503 emb CADV01004507.1 | 2975  | 8135  | 11 | 1 |
| <a href="#">XLOC_015615</a><br><a href="#">XLOC_015610</a> | gi 351007549 emb CADV01004461.1 | 11650 | 15737 | 9  | 1 |
